# Supplementary material
Source: PubMed Central journal article supplement (PMC6557732)
Supplement: mmc9.pdf [file mmc9.pdf]

# Impact and Evolutionary Determinants of Neanderthal Introgression on Transcriptional and Post-Transcriptional Regulation

Martin Silvert,<sup>1,2</sup> Lluís Quintana-Murci,<sup>1,3,\*</sup> and Maxime Rotival<sup>1,3,\*</sup>

Archaic admixture is increasingly recognized as an important source of diversity in modern humans, and Neanderthal haplotypes cover 1%–3% of the genome of present-day Eurasians. Recent work has shown that archaic introgression has contributed to human phenotypic diversity, mostly through the regulation of gene expression. Yet the mechanisms through which archaic variants alter gene expression and the forces driving the introgression landscape at regulatory regions remain elusive. Here, we explored the impact of archaic introgression on transcriptional and post-transcriptional regulation. We focused on promoters and enhancers across 127 different tissues as well as on microRNA (miRNA)-mediated regulation. Although miRNAs themselves harbor few archaic variants, we found that some of these variants may have a strong impact on miRNA-mediated gene regulation. Enhancers were by far the regulatory elements most affected by archaic introgression: up to one-third of the tissues we tested presented significant enrichments. Specifically, we found strong enrichments of archaic variants in adipose-related tissues and primary T cells, even after accounting for various genomic and evolutionary confounders such as recombination rate and background selection. Interestingly, we identified signatures of adaptive introgression at enhancers of some key regulators of adipogenesis, raising the interesting hypothesis of a possible adaptation of early Eurasians to colder climates. Collectively, this study sheds new light on the mechanisms through which archaic admixture has impacted gene regulation in Eurasians and, more generally, increases our understanding of the contribution of Neanderthals to the regulation of acquired immunity and adipose homeostasis in modern humans.

The sequencing of the genomes of extinct human forms, such as Neanderthals or Denisovans, has enabled the mapping of archaic variants in the genomes of modern humans.<sup>1–7</sup> This archaic introgression has functional consequences today, as introgressed variants have been reported to alter a variety of phenotypes ranging from skin pigmentation to sleeping patterns and mood disorders.<sup>8,9</sup> Furthermore, several studies have shown that Neanderthal haplotypes are enriched in regulatory variants, with respect to non-archaic haplotypes,<sup>10,11</sup> suggesting that archaic introgression might impact complex, organismal phenotypes through changes in gene expression. Indeed, up to one-quarter of Neanderthal-introgressed haplotypes have been estimated to present *cis*-regulatory effects across tissues and there is a bias toward downregulation of Neanderthal alleles in brain and testes.<sup>12</sup> Furthermore, genes involved in innate immunity and interactions with RNA viruses have been reported to be enriched in Neanderthal ancestry.<sup>13,14</sup> Archaic variants affect, in particular, transcriptional responses to viral challenges.<sup>11,15</sup> A depletion of Neanderthal introgression has recently been documented in conserved coding regions and, surprisingly, in promoters,<sup>16</sup> suggesting that archaic introgression could affect gene expression through promoter-independent mechanisms. One such example is found in post-transcriptional regulation by miRNAs; such regulation has been reported to contribute to phenotypic differences between archaic and modern humans.<sup>17,18</sup> Thus, the relative contri-

butions of transcriptional and post-transcriptional mechanisms to the effects of archaic variants on gene expression remain to be determined.

Our understanding of the selective forces that shaped the landscape of archaic introgression is also rapidly growing. In most cases, archaic variants were selected against, and regions of higher selective constraint, in particular those that are X-linked or contain testis-expressed and meiotic-related genes, were depleted in archaic ancestry.<sup>1,2,19</sup> Some studies have also suggested that Neanderthals had a reduced effective population size<sup>6,7</sup> because of a prolonged bottleneck or a deeply structured population.<sup>6,20,21</sup> Natural selection in Neanderthals would thus have been less efficient in purging deleterious mutations,<sup>22,23</sup> a large proportion of which were removed from the genome of modern humans after their admixture with Neanderthals.<sup>16</sup> However, archaic variants have also contributed, in some cases, to human adaptation<sup>15,24–28</sup> shortly after their introduction into modern humans or after an initial period of genetic drift.<sup>29,30</sup> Given the rapid evolution of regulatory regions and their potential adaptive nature,<sup>31,32</sup> the evolutionary dynamics of Neanderthal introgression at regulatory elements needs to be explored in further detail.

In this study, we aimed to increase knowledge about the impact archaic introgression has had on transcriptional and post-transcriptional mechanisms; we focused on promoter-, enhancer-, and microRNA (miRNA)-mediated regulation.<sup>33,34</sup> To this end, we first characterized the set

<sup>1</sup>Human Evolutionary Genetics Unit, Institut Pasteur, Centre National de la Recherche Scientifique, UMR 2000, 75015 Paris, France; <sup>2</sup>Sorbonne Universités, École Doctorale Complexité du Vivant, 75005 Paris, France

<sup>3</sup>These authors contributed equally to this work

\*Correspondence: [quintana@pasteur.fr](mailto:quintana@pasteur.fr) (L.Q.-M.), [maxime.rotival@pasteur.fr](mailto:maxime.rotival@pasteur.fr) (M.R.)

<https://doi.org/10.1016/j.ajhg.2019.04.016>

© 2019 American Society of Human Genetics.

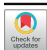

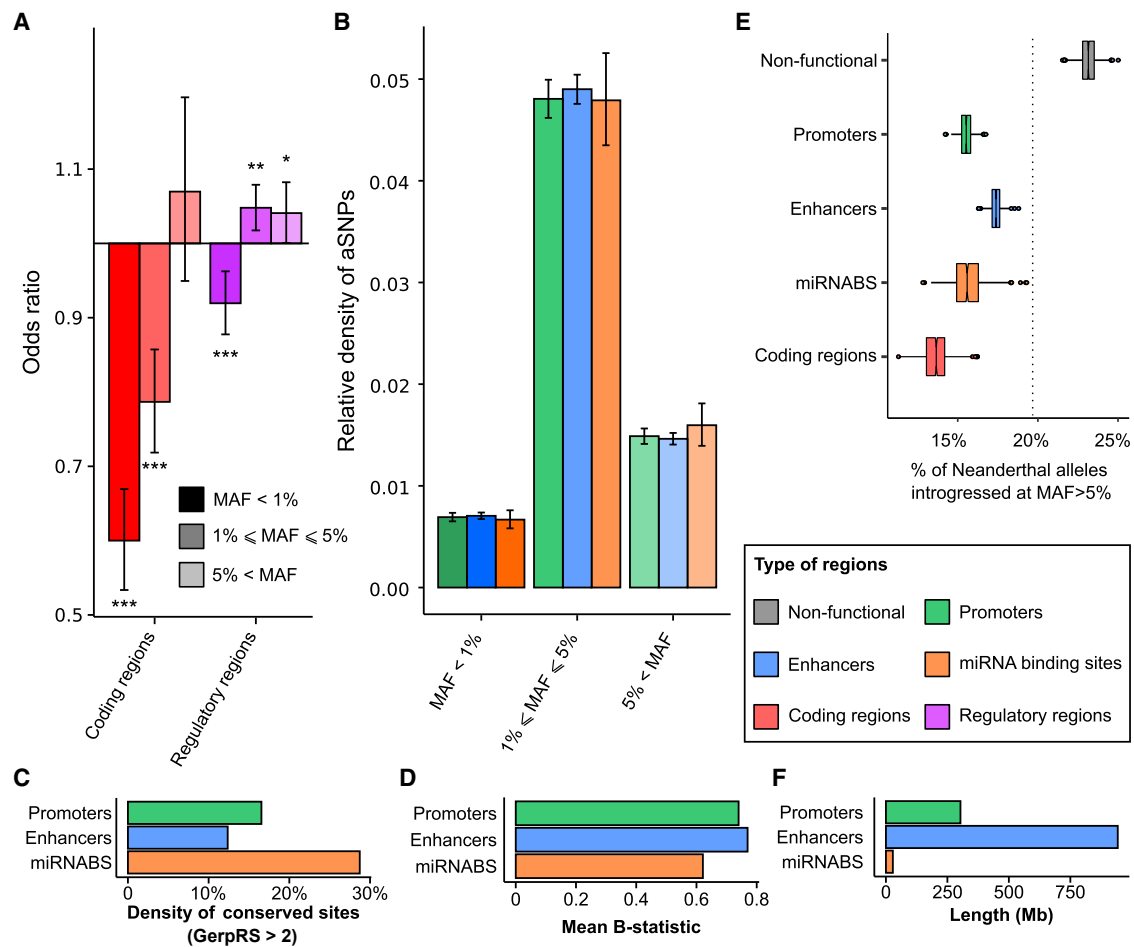

**Figure 1. Enrichment of Neanderthal Variants in Regulatory Regions**

(A) Odds ratio depicting the excess or depletion of Neanderthal variants in coding regions and regulatory elements (promoters, enhancers, and miRNA binding sites) compared to the remainder of the genome. Enrichments are shown for three bins of minor-allele frequencies (MAFs), together with 95% bootstrap confidence intervals: \*p value < 0.05, \*\*p value < 0.01, \*\*\*p value < 0.001.

(B) Relative density of aSNPs in promoters, enhancers, and miRNA binding sites in different MAF bins, with 95% bootstrap confidence intervals.

(C and D) Comparison of density of conserved sites (GerpRS > 2) and mean B statistic of promoters, enhancers, and miRNA binding sites. (E) Percentage of alleles that are fixed in Neanderthal, absent from the African Yoruba from Nigeria (YRI), and introgressed at a MAF > 5% in Eurasians. For each type of region, box plots show the variability of the estimates based on 1,000 bootstrap resamples of 100 kb genomic windows. The dashed vertical line indicates the genome-wide average.

(F) Total length of promoters, enhancers, and miRNA binding sites.

of variants of putative Neanderthal origin — archaic SNPs (aSNPs) — as those for which one allele is both present in the Neanderthal Altai genome<sup>6</sup> and absent in the Yoruba African population of the 1000 Genomes Project<sup>35</sup> (see [Supplemental Data](#)). We further required aSNPs to be located in genomic regions where Neanderthal introgression has already been detected in Europe or Asia.<sup>1</sup> We then investigated deviations in the presence or absence of aSNPs among specific classes of functional elements by measuring the density of aSNPs with respect to that of non-aSNPs in the European (CEU) and Asian (CHB) populations of the 1000 Genomes Project.<sup>35</sup> We then compared the relative density of aSNPs at specific functional regions to that in the rest of the genome. Genomic regions were considered as enriched or depleted in aSNPs if the resulting odds ratio (OR) was significantly different from 1.

Overall, we observed a strong depletion of aSNPs in coding regions (OR = 0.71, p value < 10<sup>-4</sup>) and similar levels of introgression at regulatory regions compared to those of non-functional elements. We then divided genetic variants according to the frequency of their minor allele, which corresponds to the Neanderthal allele in 99.8% of all aSNPs. Minor-allele frequency (MAF) was computed in Eurasian populations combined, and variants were split into three bins (rare – MAF < 1%, low frequency – 1% ≤ MAF < 5%, and common – MAF ≥ 5%). In doing so, we found that the depletion in coding regions was driven by rare and low-frequency variants (OR < 0.79, p value < 2 × 10<sup>-5</sup>, [Figure 1A](#)), whereas regulatory regions were weakly enriched in low-frequency and common aSNPs (OR > 1.04, p value < 0.05). We then used the ancestral or derived state of each aSNP to distinguish between derived alleles

that originated in the Neanderthal lineage (i.e., derived aSNPs, 91% of all aSNPs) and ancestral alleles that were re-introduced by Neanderthals after the fixation of the derived allele in the human lineage (i.e., ancestral aSNPs, 9% of all aSNPs, Figure S1). When comparing derived aSNPs to non-archaic variants of similar derived allele frequency (DAF), we observed a depletion of both coding and regulatory regions in rare archaic variants (DAF < 1%, OR < 0.91,  $p < 2 \times 10^{-4}$ ), and there was no significant enrichment of common and low-frequency aSNPs in regulatory regions. Interestingly, when focusing on variants presenting a DAF  $\geq 95\%$  (i.e., ancestral aSNPs at  $\leq 5\%$  frequency), we observed an enrichment of archaic variants in regulatory regions (OR > 1.25,  $p < 2 \times 10^{-5}$ ), highlighting the contribution that ancestral alleles re-introgressed by Neanderthals make to gene regulation in humans.

To understand how introgression has impacted genetic diversity across various types of regulatory elements, we then investigated the relative density of aSNPs across promoters, enhancers, and miRNA binding sites. Although this metric differed markedly across frequency bins, it did not differ across categories of regulatory elements, despite their important differences in strength of negative or background selection (Figure 1B–1D). However, when measuring the rate at which Neanderthal alleles were introgressed in Europe or Asia, we found that they were less likely to reach high frequency (MAF > 5%) in coding or regulatory regions with respect to non-functional regions ( $p < 10^{-10}$ , Figures 1E and S2). This effect was less marked among enhancers, and that, together with the larger size of enhancers (Figure 1F), suggests that Neanderthal variants are quantitatively more likely to affect gene regulation via modification of enhancer activity than through changes of promoter or miRNA binding sites.

Given the low fraction of the genome that is covered by miRNAs and miRNA-binding sites (miRNABS) (Figure 1F), they are expected to be, quantitatively, the least affected by archaic introgression. Indeed, we only found six aSNPs that overlap the sequence of mature miRNAs, two of which alter the seed region (Figure 2A): rs74904371 in miR-2682-3p (MAF<sub>CHB</sub> = 0, MAF<sub>CEU</sub> = 3%) and rs12220909 in miR-4293 (MAF<sub>CHB</sub> = 17%, MAF<sub>CEU</sub> = 0). The presence of aSNPs in four of these miRNAs, particularly those located in seed regions, affected the set of genes they bind (Figure 2B and Table S1). We also detected 2,909 aSNPs in miRNABS, 29% of which were common (Table S2). We found a direct linear relationship between the number of genes bound by a miRNA and the number of aSNPs in its binding sites ( $r = 0.56$ ,  $p$  value <  $10^{-10}$ , Figure 2C), suggesting that introgression affected miRNABS independently of their cognate miRNAs. As a pertinent example, the *ONECUT2* locus (MIM: 604894) presents the highest number of aSNPs that alter conserved miRNABS (Figure 2D) and has been previously reported to be a likely target of adaptive introgression.<sup>24</sup> This gene, which encodes a member of the oncut family of transcription factors, contains 13 aSNPs that alter miRNABS, six of

which are highly conserved (GerpRS > 2). Interestingly, these aSNPs fall within the 0.4% most-differentiated aSNPs between Europeans and Asians at the genome-wide level ( $F_{ST} > 0.38$ ). We also detected aSNPs, mostly population specific, that alter conserved miRNABS at several key immune genes, including *CXCR5* (MIM: 601613; MAF<sub>CHB</sub> = 16%, MAF<sub>CEU</sub> = 1%), *TLR6* (MIM: 605403; MAF<sub>CHB</sub> = 8%, MAF<sub>CEU</sub> = 0), *IL7R* (MIM: 146661; MAF<sub>CHB</sub> = 8%, MAF<sub>CEU</sub> = 0), and *IL21* (MIM: 605384; MAF<sub>CHB</sub> = 0, MAF<sub>CEU</sub> = 8%).

Next, we focused on how archaic introgression has affected promoters and enhancers. Given the tissue-specific impact of archaic introgression on gene regulation,<sup>10,12</sup> we searched for enrichments in Neanderthal ancestry across regulatory elements in 127 different tissues.<sup>33</sup> The impact of archaic introgression in promoters was similar to that in the remainder of the genome in all tissues and frequency bins (Table S3). Conversely, we found that enhancers are enriched in common aSNPs in 42 tissues (FDR < 5%, Figure 3A and Table S4), and we detected similar patterns in CEU and CHB populations ( $r = 0.62$ , Figure S3). Among the 42 tissues presenting significant enrichments, adipose-derived mesenchymal stem cells (AdMSCs) and mesenchymal stem-cell-derived adipocytes were the most enriched (OR > 1.13,  $p$  value <  $3 \times 10^{-5}$ ), followed by fetal heart (OR = 1.15,  $p$  value =  $8 \times 10^{-5}$ ), small intestine (OR = 1.21,  $p$  value =  $2 \times 10^{-4}$ ), and different T cell tissues (OR > 1.14,  $p$  value <  $1.5 \times 10^{-2}$ ). When restricting our analyses to derived aSNPs (and using SNPs with DAF < 50% as background set), we replicated the enrichments at enhancers for 27 tissues (FDR < 5%, Tables S3 and S4), indicating that the impact of archaic introgression for these tissues is driven by Neanderthal-derived variants.

Focusing on circulating immune cell types (Figure 3B), we found enrichments among enhancers of various types of primary T cells, the most significant being CD4<sup>+</sup>/CD25<sup>-</sup> memory T cells (OR = 1.21,  $p$  value =  $2.2 \times 10^{-4}$ ), whereas enhancers of B cells, monocytes, and natural killer cells exhibited a density of common aSNPs similar to genome-wide expectations. We also observed that shared enhancers across different T cell subtypes (i.e., active in more than half of T cell subtypes, “core T cell enhancers”) display an enrichment in aSNPs (OR = 1.22,  $p$  value =  $5 \times 10^{-4}$ , Figure 3C) with respect to more specialized enhancers that are only active in a small fraction of T cell subtypes.

We sought to assess whether the enrichment in aSNPs detected in enhancers resulted from an excessive divergence of these elements in the Neanderthal lineage or from a higher rate of archaic introgression at enhancers. We quantified the number of fixed human-Neanderthal differences at enhancers across the 127 tissues and focused on sites where both the Altai and Vindija Neanderthal genomes<sup>6,7</sup> differ from the ancestral sequence. We uncovered large tissue variability; we found that enhancers active in induced pluripotent stem cells presented the highest

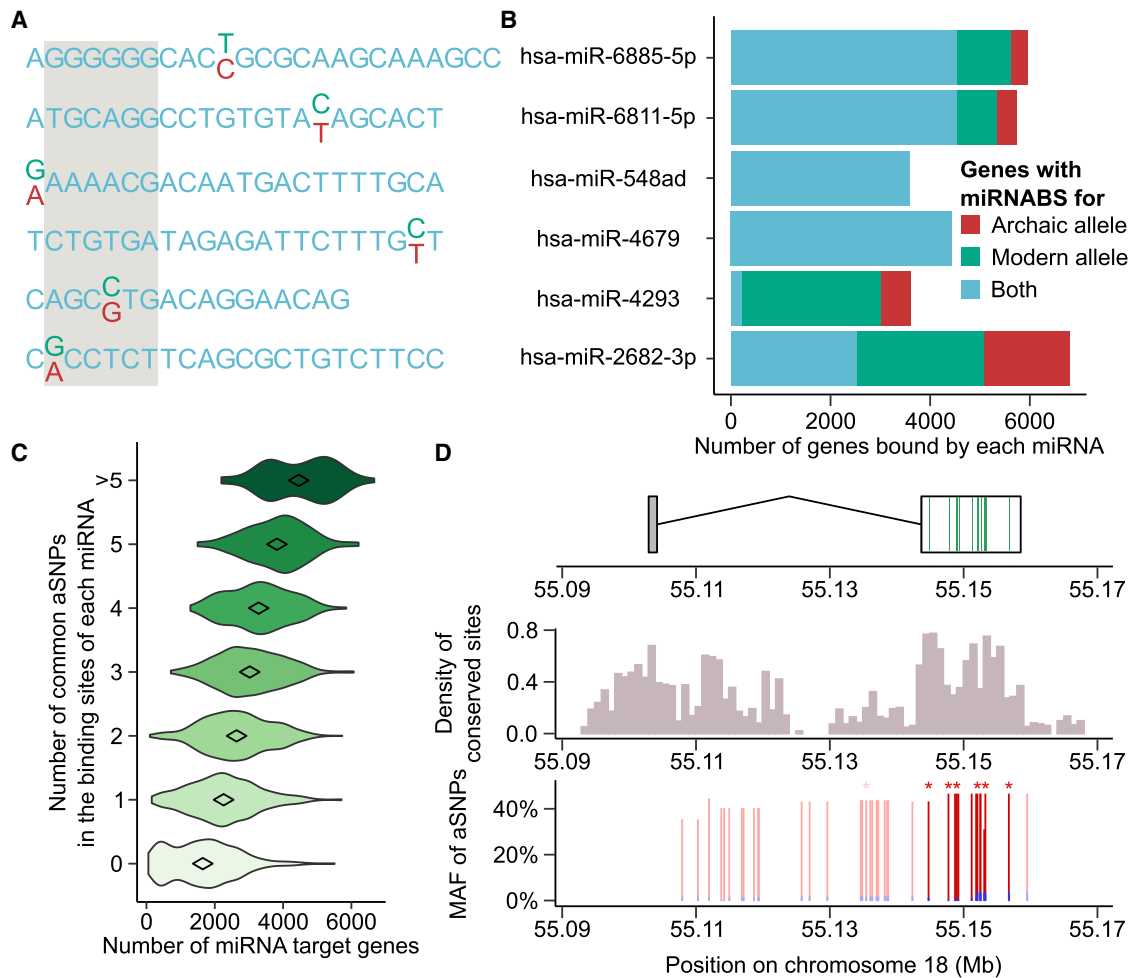

**Figure 2. Effects of Archaic Introgression on miRNA-Mediated Regulation**

(A) Representation of the archaic (red) and modern (green) human alleles for the six miRNAs presenting a Neanderthal-introgressed variant in their mature sequence. The seed region of the miRNAs is shaded in gray.

(B) Total number of genes bound by the archaic and/or modern human allele of each of the six miRNAs harboring a Neanderthal variant in their mature sequence.

(C) Relationship between the number of targets of each miRNA and the number of common aSNPs in the corresponding miRNA binding sites.

(D) Introgression of aSNPs altering the miRNABS at the *ONECUT2* locus (MIM: 604894). Gene structure is shown in the upper panel, and miRNA binding sites that are altered by archaic introgression are highlighted in green. The middle panel represents the density of conserved sites (GerpRS > 2) in 1,000 bp windows, and the bottom panel represents the repartition and frequency of archaic alleles at the locus (blue for CEU, red for CHB). aSNPs that overlap miRNABS are represented with a darker shade, and aSNPs that disrupt a conserved site are marked with stars.

divergence (290 differences/Mb) and that those active in pancreas cells showed the lowest (220 differences/Mb). However, given that the number of fixed differences strongly correlates with genetic diversity (i.e., density of common variants,  $r = 0.71$ ,  $p$  value  $< 10^{-20}$ ), we measured the ratio of the number of fixed differences between humans and Neanderthals differences to that of common, segregating SNPs in the region. Using this metric, we found that enhancers of T cells displayed the strongest divergence (7% increase compared to the mean across tissues, Wilcoxon  $p$  value  $< 2 \times 10^{-8}$ ), whereas stem cells showed the lowest (4% decrease, Wilcoxon  $p$  value  $< 7 \times 10^{-6}$ ) (Figure 4A). Focusing on the rate of introgression, which is defined as the proportion of Neanderthal-descended al-

les that are present in the human genome at a MAF > 5%, we found that enhancers of T cells showed the highest percentage (5% increase, Wilcoxon  $p$  value  $< 2 \times 10^{-5}$ ), whereas brain cells showed the lowest percentage (7% decrease, Wilcoxon  $p$  value  $< 4 \times 10^{-5}$ ) (Figure 4A).

We then explored the factors that might drive, at the genome-wide level, the detected variation in Neanderthal divergence and archaic introgression. Using 100 kb windows, we correlated divergence and introgression with metrics that capture local variation in neutral (mutation and recombination) and selected (negative and background selection) diversity. Specifically, we measured the percentage of guanine-cytosine (GC) to account for their higher mutability, genetic size as measure of

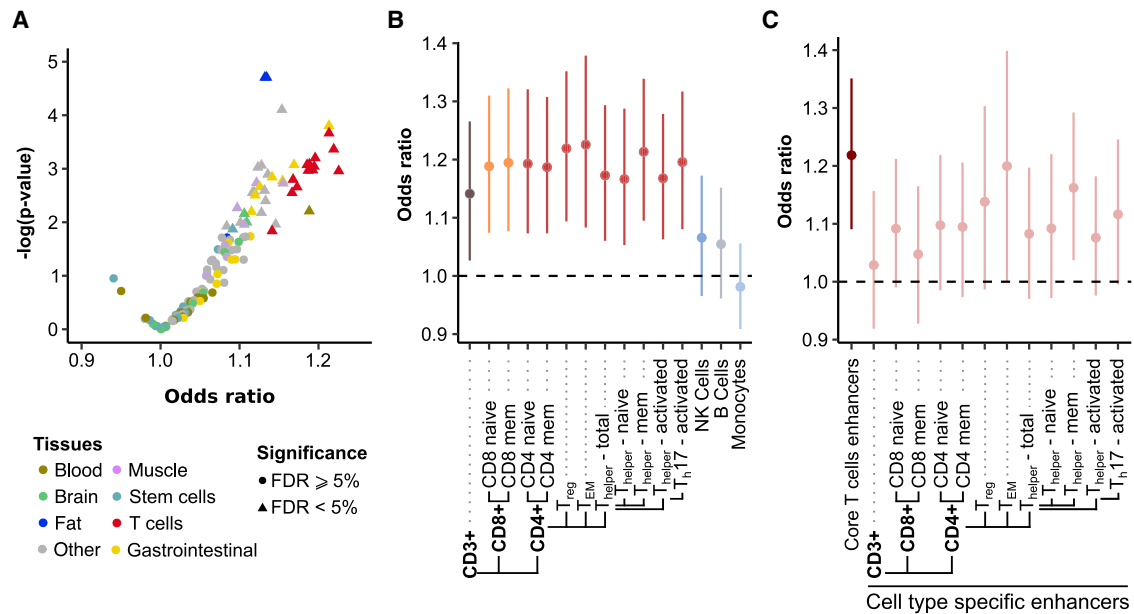

**Figure 3. Effects of Archaic Introgression at Enhancers**

(A) Volcano plot illustrating the enrichment of common aSNPs in the enhancers of 127 different tissues from the Epigenomic Roadmap Consortium. Tissues with FDR < 5% (triangles) are significantly enriched.

(B) Enrichments of common aSNPs in the enhancers of different immune tissues. Vertical bars indicate 95% confidence intervals computed by bootstrap analysis.

(C) Enrichment of common aSNPs in the enhancers that are active in more than half of the investigated T cell subtypes (dark red, referred to as “core T cells”) and in enhancers that are active in each T cell subtype and are not part of core T cell enhancers (light red, referred to as “cell-type-specific enhancers”). Vertical bars indicate 95% confidence intervals computed by bootstrap.

(B and C) Note that CD4<sup>+</sup> T cells are separated on the basis of CD25 so that T<sub>reg</sub> (CD25<sup>+</sup>), T<sub>EM</sub> (CD25<sup>low</sup>), and T<sub>helper</sub> (CD25<sup>-</sup>) are distinguished from one another.

recombination rate, density of conserved sites (GerpRS > 2) as a measure of negative selection, and background selection derived as  $(1 - B)$ , where B is the mean B statistic in the window.<sup>36</sup> We found that background selection correlated with a lower rate of archaic introgression ( $r = -0.049$ ,  $p$  value <  $10^{-15}$ , Figure 4B), consistent with previous findings,<sup>1,2</sup> but also correlated with increased local divergence ( $r = 0.22$ ,  $p$  value <  $10^{-20}$ , Figure 4C) and reduced density of both common variants and fixed differences ( $r = -0.46$  and  $-0.05$ , respectively,  $p$  value <  $5 \times 10^{-20}$ , Figure S4). We also found that negative selection and recombination rate correlated with both divergence and introgression, even after we adjusted for background selection (Figure S5).

To understand further how these factors could account for the variation in divergence and introgression detected at enhancers (Figure S6), we focused on three model tissues: T cells (enhancers with high divergence and introgression), AdMSCs (enhancers with low divergence and high introgression), and prefrontal cortex (enhancers with high divergence and low introgression) (Figure 4D). When correcting for the various neutral and selective factors, we found that introgression at T cell enhancers did not exceed that of other tissues ( $p$  value > 0.11), but the high divergence and relative density of aSNPs remained significant ( $p$  value <  $8 \times 10^{-3}$ ). For AdMSCs, introgression remained higher than expected ( $p$  value =  $4 \times 10^{-3}$ ), leading to an excess

of aSNPs despite their depletion in divergence ( $p$  value =  $3.8 \times 10^{-2}$ ). For enhancers active at the prefrontal cortex, all variables were within expected bounds. Collectively, these analyses indicate that variation of several neutral and selective factors is not sufficient to explain the excess of Neanderthal introgression detected at enhancers. Some enhancers might have undergone past adaptation in the Neanderthal lineage or adaptive introgression in modern humans, as illustrated by T cells and AdMSCs, respectively.

Finally, we explored the impact of archaic introgression at enhancers on gene expression. To identify genes whose expression is altered by Neanderthal introgression at enhancers, we focused on tissues where data from promoter capture Hi-C were available<sup>37,38</sup> and assigned each enhancer located in a promoter-interacting region to the corresponding gene(s). Archaic variants at enhancers predicted to interact with a gene were strongly enriched in eQTLs (OR = 2.6,  $p$  value <  $10^{-3}$ , Supplemental Note 1 and Figure S7), further supporting the regulatory potential of aSNPs. Genes interacting with T cell enhancers that harbor common aSNPs ( $n = 1,629$ , Table S5) were not enriched in any specific biological function. However, 285 of these genes are highly expressed in T cells (fragments per kilobase of transcript per million mapped reads [FPKM] > 100) and include known regulators of the immune response (e.g., *CXCR4* [MIM: 162643], *IL7R* [MIM: 146661], *IL10RA* [MIM: 146933], *NFKBIA*



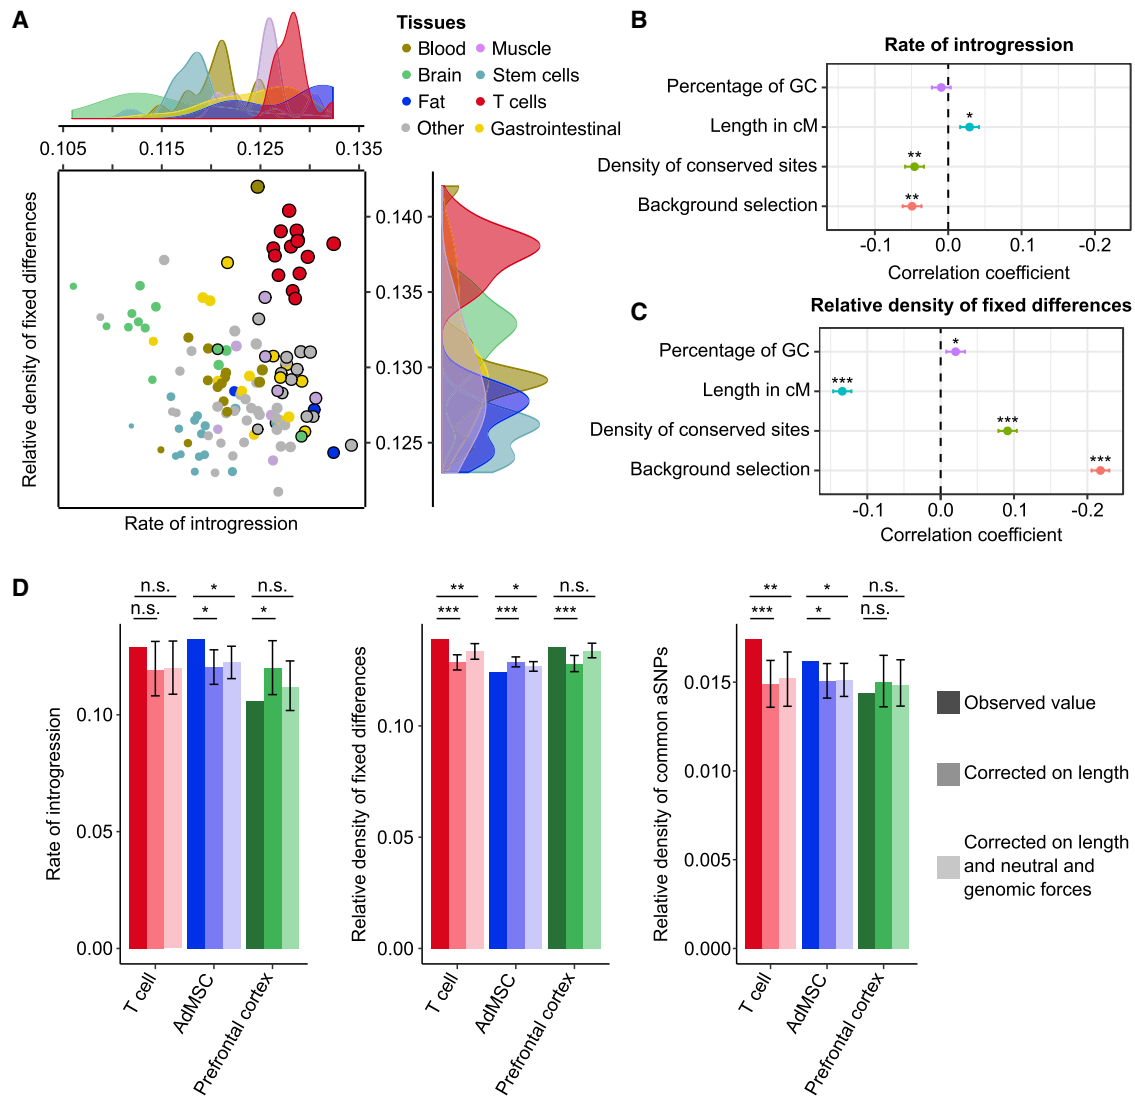

**Figure 4. Factors Shaping Human-Neanderthal Divergence and Archaic Introgression at Enhancers**

(A) Comparison of the relative density of fixed human-Neanderthal differences and rate of introgression in the enhancers of the 127 tissues studied. The size of the circles is proportional to the relative density of common aSNPs in the enhancers of the corresponding tissue; a black circle is added when the relative density of common aSNPs is significantly higher in these enhancers ( $FDR < 5\%$ ) than in the rest of the genome. The density of each tissue category along the two axes is also presented.

(B and C) Genome-wide correlations, using 100 kb windows, between either the rate of Neanderthal introgression (B) or the relative density of fixed human-Neanderthal differences (C) and neutral and selective forces. \* $p$  value  $< 10^{-2}$ , \*\* $p$  value  $< 10^{-10}$ , and \*\*\* $p$  value  $< 10^{-20}$ . For each correlation, horizontal lines indicate 95% confidence interval.

(D) Observed values of rate of introgression and relative density of fixed differences and common aSNPs at the enhancers of core T cells, AdMSCs, and prefrontal cortex, with respect to expectations based on 100 kb windows matched for length of enhancers alone or for length of enhancers, percentage of GC, recombination rate, density of conserved sites, and mean B statistic of their enhancers (see Supplemental Data). n.s. = not significant; \* $p$  value  $< 0.05$ , \*\* $p$  value  $< 0.01$ , and \*\*\* $p$  value  $< 10^{-3}$ . Errors bars indicate 95% confidence intervals of the expected values obtained by resampling.

[MIM: 164008], and *PTPRC* [MIM: 151460]). We found 14 loci presenting signatures of adaptive introgression; i.e., these were genes that interact with enhancers harboring very-high-frequency aSNPs (99<sup>th</sup> percentile of MAF:  $MAF_{CEU} > 0.29$  or  $MAF_{CHB} > 0.35$ ; Figures 5A and 5B). Among these, we found *ANKRD27*, which is associated with eosinophilic esophagitis (MIM: 610247),<sup>39</sup> and *MED15* (MIM: 607372), which is involved in several cancers.<sup>40–42</sup> With respect to adipose-related tissues, we identified 690 genes — 43 of which were highly expressed

(FPKM  $> 100$ ) in the adipose tissue — interacting with AdMSC enhancers that contain common aSNPs (Table S6). These genes were enriched in functions related to the regulation of cell motility (GO: 2000145,  $p$  value  $< 2.0 \times 10^{-8}$ ) and insulin-like growth factor binding protein complex (GO: 0016942,  $p$  value  $< 2.7 \times 10^{-5}$ ) (Table S7). We detected 16 aSNPs at AdMSC enhancers that present strong signatures of adaptive introgression (Figures 5C and 5D).

This study reconstructs the history of how Neanderthal introgression has affected various types of regulatory

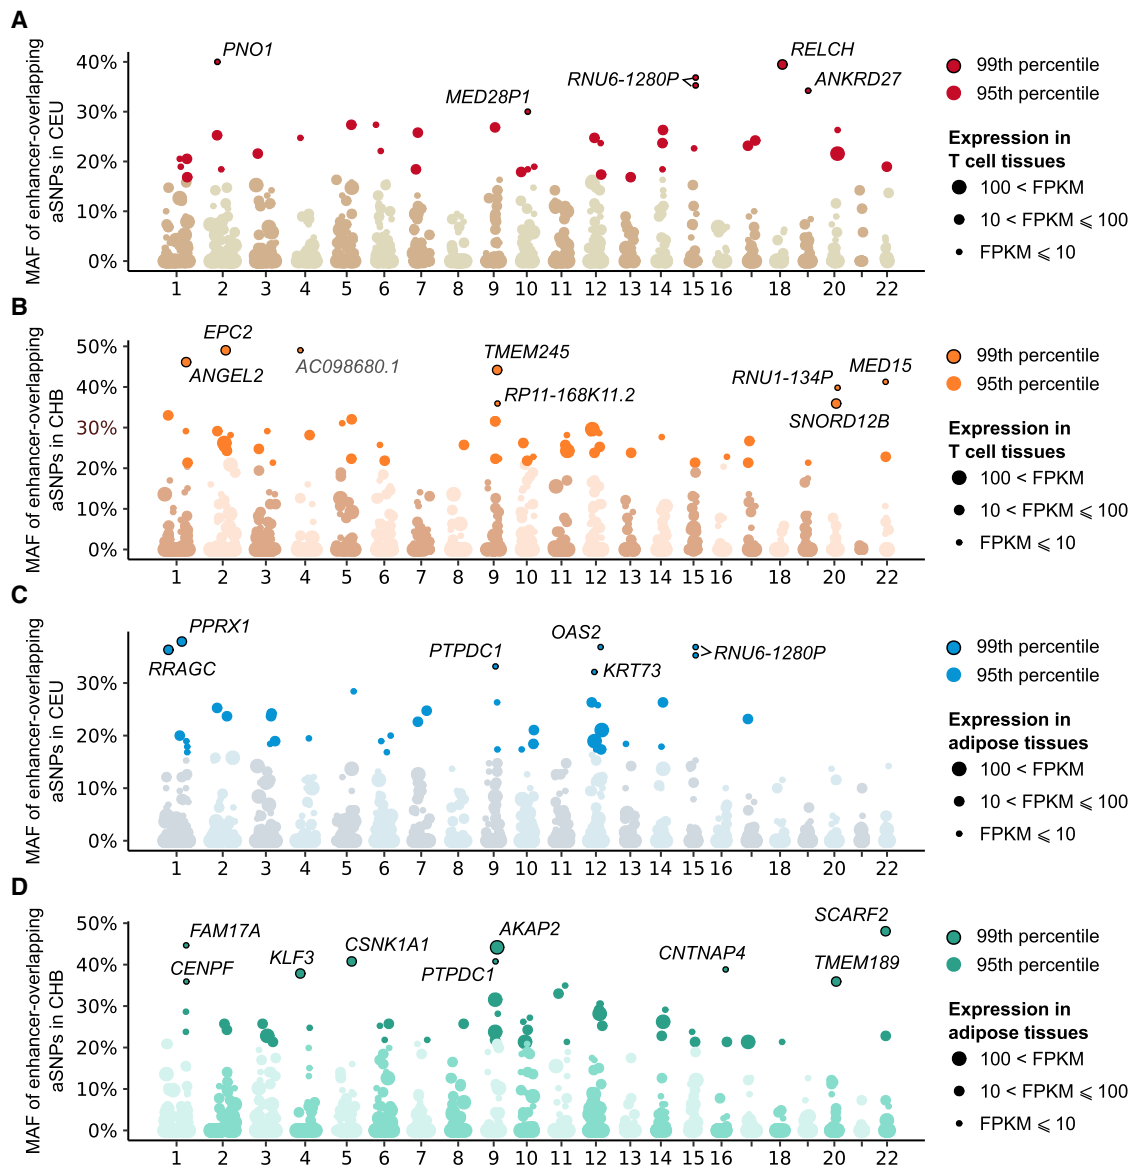

**Figure 5. Manhattan Plots of Genes Interacting with Enhancers That Contain Archaic Variants**

(A and B) Genome-wide distribution of MAFs in CEU or CHB at aSNPs that overlap enhancers active in T Cells (core T cell enhancers). For each window of 1 Mb along the genome, only the aSNP with the highest MAF is shown. Point sizes reflect FPKM of the most expressed genes (max FPKM across T lymphocytes from Blueprint database<sup>58</sup>) among genes interacting with the enhancer in T cells.<sup>37</sup> (C and D) Similar plots for enhancers active in AdMSCs. Point sizes reflect the FPKM of the most expressed gene (max FPKM in GTEx tissues *Adipose—Subcutaneous* and *Adipose—Visceral [Omentum]*<sup>59</sup>) among genes interacting with the enhancer in adipose tissue.<sup>38</sup>

elements as well as the mechanistic bases through which archaic variants have altered gene regulation. Previous studies have shown that archaic variants are more likely to correlate with gene expression than non-archaic variants segregating at the same frequency.<sup>10,11</sup> Our approach differs from these studies in that it excludes indirect effects from non-archaic variants segregating on introgressed haplotypes and that it focuses on the direct regulatory potential of archaic alleles. In doing so, we find little evidence for an enrichment of common archaic variants in regulatory regions taken as a whole; these results might seem at odds with previous studies. Yet one should note that the functional impact of the archaic material we measure can

be decomposed in two separate components: (1) the frequency at which Neanderthal haplotypes are introgressed into the human lineage, which corresponds to the rate of introgression measured by the  $f_4$ -ratio statistics,<sup>16</sup> and (2) the degree of human-Neanderthal divergence at regulatory elements, which determines the probability that introgressed haplotypes carry a functional variant. Indeed, when focusing on the rate of introgression, we find that Neanderthal alleles were introgressed at a lower rate in regulatory regions, consistent with recent findings for promoter regions.<sup>16</sup> This lower introgression rate is nevertheless compensated by a higher human-Neanderthal divergence at regulatory regions (Figure S8), which is

consistent with an increased probability that Neanderthal haplotypes are associated with gene expression.<sup>10,11</sup>

We also explored how Neanderthal introgression has impacted miRNA-mediated regulation, and we showed that although miRNAs harbor few archaic variants per se, some of them might impact strongly miRNA-mediated gene regulation and disease risk. For example, the archaic allele at miR-4293 (rs12220909) is responsible for the loss of 95% of its targets and has been associated with diminished cancer susceptibility.<sup>43,44</sup> Archaic introgression has also affected miRNA binding sites, as illustrated by *ONECUT2* (MIM: 604894), where an archaic haplotype that is present at a high frequency in Asia ( $MAF_{CHB} = 0.49$ ) alters multiple conserved miRNA binding sites. *ONECUT2* is involved in liver, pancreas, and nervous-system development<sup>45</sup> and has recently been proposed as a regulator of tumor growth in ovarian cancer (MIM: 167000).<sup>46</sup>

Finally, our study reveals that archaic introgression has impacted enhancers in a tissue-specific manner, reflecting either high human-Neanderthal differentiation, as observed in T cell enhancers, or increased archaic introgression, as detected in AdMSCs. Interestingly, the AdMSC enhancers impacted by archaic introgression interact preferentially with genes involved in the regulation of adipocyte differentiation and adipogenesis. These include receptors such as *PDGFRB* (MIM: 173410) and *TGFBR2* (MIM: 190182), the insulin growth factor *IGF1* (MIM: 147440) and its binding partners *IGFBP2* (MIM: 146731) and *IGFBP3* (MIM: 146732), and the *CXCR4* chemokine (MIM: 162643).<sup>47–53</sup> Furthermore, two of the enhancers harboring archaic variants at the highest frequencies interact with key adipocyte-differentiation regulators, such as *KLF3* (MIM: 609392) and *PRRX1* (MIM: 167420),<sup>54,55</sup> suggesting that introgression at AdMSC might have been adaptive in humans. In support of this notion, Dannemann and colleagues have found that more than half of aSNPs associated with gene expression in subcutaneous adipose tissue had increased in frequency over the last 10,000 years, whereas the majority of aSNPs had decreased in frequency over the same period of time.<sup>10</sup> Given the proposed adaptation of Neanderthals to cold environments,<sup>56</sup> it is tempting to speculate that archaic alleles at enhancers of AdMSCs provided a selective advantage to early modern humans during their migration out of Africa. This hypothesis becomes particularly interesting in light of previously reported cases of adaptive introgression at the *LEPR* (MIM: 601007) locus and at the locus of the *WARS2* (MIM: 604733) and *TBX15* (MIM: 604127) genes, both loci being involved in the regulation of adipose tissue differentiation and body-fat distribution.<sup>25,57</sup> Further studies aiming to functionally characterize the regulatory effects of Neanderthal variants on adipocyte differentiation and fat distribution are now required, as these archaic variants might have contributed to the adaptation of early Eurasians to colder climates.

## Supplemental Data

Supplemental Data can be found online at <https://doi.org/10.1016/j.ajhg.2019.04.016>.

## Acknowledgments

This work was supported by the Institut Pasteur, the Centre National de la Recherche Scientifique (CNRS), and the Agence Nationale de la Recherche (ANR) grants: “TEIHSEER” ANR-14-CE14-0008-02 and “TBPATHTGEN” ANR-14-CE14-0007-02. The laboratory of L.Q.M. has received funding from the French government’s Investissement d’Avenir program, Laboratoire d’Excellence “Integrative Biology of Emerging Infectious Diseases” (grant no. ANR-10-LABX-62-IBEID). M.S. was funded by the Ecole Doctorale “Complexité du vivant,” Sorbonne Université (contract n°2532/2016).

## Declaration of Interests

The authors declare no competing interests.

Received: January 12, 2019

Accepted: April 23, 2019

Published: May 30, 2019

## Web Resources

1000 Genomes Project, <http://www.internationalgenome.org/>  
Epigenomic Roadmaps, [https://egg2.wustl.edu/roadmap/web\\_portal/](https://egg2.wustl.edu/roadmap/web_portal/)  
Genotype-Tissue Expression (GTEx) project, <https://gtexportal.org/home/>  
miRanda Software, <http://www.microna.org/microna/>  
Neanderthal Genomes, <http://cdna.eva.mpg.de/neandertal/>  
OMIM, <http://www.omim.org>

## References

1. Sankararaman, S., Mallick, S., Dannemann, M., Prüfer, K., Kelso, J., Pääbo, S., Patterson, N., and Reich, D. (2014). The genomic landscape of Neanderthal ancestry in present-day humans. *Nature* 507, 354–357.
2. Sankararaman, S., Mallick, S., Patterson, N., and Reich, D. (2016). The combined landscape of Denisovan and Neanderthal ancestry in present-day humans. *Curr. Biol.* 26, 1241–1247.
3. Vernot, B., and Akey, J.M. (2014). Resurrecting surviving Neanderthal lineages from modern human genomes. *Science* 343, 1017–1021.
4. Vernot, B., Tucci, S., Kelso, J., Schraiber, J.G., Wolf, A.B., Gittelman, R.M., Dannemann, M., Grote, S., McCoy, R.C., Norton, H., et al. (2016). Excavating Neanderthal and Denisovan DNA from the genomes of Melanesian individuals. *Science* 352, 235–239.
5. Browning, S.R., Browning, B.L., Zhou, Y., Tucci, S., and Akey, J.M. (2018). Analysis of human sequence data reveals two pulses of archaic Denisovan admixture. *Cell* 173, 53–61.e9.
6. Prüfer, K., Racimo, F., Patterson, N., Jay, F., Sankararaman, S., Sawyer, S., Heinze, A., Renaud, G., Sudmant, P.H., de Filippo, C., et al. (2014). The complete genome sequence of a Neanderthal from the Altai Mountains. *Nature* 505, 43–49.



7. Prüfer, K., de Filippo, C., Grote, S., Mafessoni, F., Korlević, P., Hajdinjak, M., Vernot, B., Skov, L., Hsieh, P., Peyrégne, S., et al. (2017). A high-coverage Neandertal genome from Vindija Cave in Croatia. *Science* 358, 655–658.
8. Dannemann, M., and Kelso, J. (2017). The contribution of Neanderthals to phenotypic variation in modern humans. *Am. J. Hum. Genet.* 101, 578–589.
9. Simonti, C.N., Vernot, B., Bastarache, L., Bottinger, E., Carrell, D.S., Chisholm, R.L., Crosslin, D.R., Hebringer, S.J., Jarvik, G.P., Kullo, I.J., et al. (2016). The phenotypic legacy of admixture between modern humans and Neandertals. *Science* 351, 737–741.
10. Dannemann, M., Prüfer, K., and Kelso, J. (2017). Functional implications of Neandertal introgression in modern humans. *Genome Biol.* 18, 61.
11. Quach, H., Rotival, M., Pothlichet, J., Loh, Y.E., Dannemann, M., Zidane, N., Laval, G., Patin, E., Harmant, C., Lopez, M., et al. (2016). Genetic adaptation and Neandertal admixture shaped the immune system of human populations. *Cell* 167, 643–656.e17.
12. McCoy, R.C., Wakefield, J., and Akey, J.M. (2017). Impacts of Neandertal-introgressed sequences on the landscape of human gene expression. *Cell* 168, 916–927.e12.
13. Deschamps, M., Laval, G., Fagny, M., Itan, Y., Abel, L., Casanova, J.L., Patin, E., and Quintana-Murci, L. (2016). Genomic signatures of selective pressures and introgression from archaic hominins at human innate immunity genes. *Am. J. Hum. Genet.* 98, 5–21.
14. Enard, D., and Petrov, D.A. (2018). Evidence that RNA viruses drove adaptive introgression between Neanderthals and modern humans. *Cell* 175, 360–371.e13.
15. Sams, A.J., Dumaine, A., Nédélec, Y., Yotova, V., Alfieri, C., Tanner, J.E., Messer, P.W., and Barreiro, L.B. (2016). Adaptively introgressed Neandertal haplotype at the OAS locus functionally impacts innate immune responses in humans. *Genome Biol.* 17, 246.
16. Petr, M., Pääbo, S., Kelso, J., and Vernot, B. (2019). Limits of long-term selection against Neandertal introgression. *Proc. Natl. Acad. Sci. USA* 116, 1639–1644.
17. Lopez-Valenzuela, M., Ramírez, O., Rosas, A., García-Vargas, S., de la Rasilla, M., Lalueza-Fox, C., and Espinosa-Parrilla, Y. (2012). An ancestral miR-1304 allele present in Neanderthals regulates genes involved in enamel formation and could explain dental differences with modern humans. *Mol. Biol. Evol.* 29, 1797–1806.
18. Gunbin, K.V., Afonnikov, D.A., Kolchanov, N.A., Derevianko, A.P., and Rogae, E.I. (2015). The evolution of Homo sapiens denisova and Homo sapiens neanderthalensis miRNA targeting genes in the prenatal and postnatal brain. *BMC Genomics* 16 (Suppl 13), S4.
19. Jégou, B., Sankararaman, S., Rolland, A.D., Reich, D., and Chalmel, F. (2017). Meiotic genes are enriched in regions of reduced archaic ancestry. *Mol. Biol. Evol.* 34, 1974–1980.
20. Kuhlwilm, M., Gronau, I., Hubisz, M.J., de Filippo, C., Prado-Martinez, J., Kircher, M., Fu, Q., Burbano, H.A., Lalueza-Fox, C., de la Rasilla, M., et al. (2016). Ancient gene flow from early modern humans into Eastern Neanderthals. *Nature* 530, 429–433.
21. Rogers, A.R., Bohlender, R.J., and Huff, C.D. (2017). Early history of Neanderthals and Denisovans. *Proc. Natl. Acad. Sci. USA* 114, 9859–9863.
22. Harris, K., and Nielsen, R. (2016). The genetic cost of Neandertal Introgression. *Genetics* 203, 881–891.
23. Juric, I., Aeschbacher, S., and Coop, G. (2016). The strength of selection against Neandertal introgression. *PLoS Genet.* 12, e1006340.
24. Racimo, F., Marnetto, D., and Huerta-Sánchez, E. (2017). Signatures of archaic adaptive introgression in present-day human populations. *Mol. Biol. Evol.* 34, 296–317.
25. Racimo, F., Gokhman, D., Fumagalli, M., Ko, A., Hansen, T., Moltke, I., Albrechtsen, A., Carmel, L., Huerta-Sánchez, E., and Nielsen, R. (2017). Archaic adaptive introgression in TBX15/WARS2. *Mol. Biol. Evol.* 34, 509–524.
26. Gittelman, R.M., Schraiber, J.G., Vernot, B., Mikacenic, C., Wurfel, M.M., and Akey, J.M. (2016). Archaic hominin admixture facilitated adaptation to out-of-Africa environments. *Curr. Biol.* 26, 3375–3382.
27. Racimo, F., Sankararaman, S., Nielsen, R., and Huerta-Sánchez, E. (2015). Evidence for archaic adaptive introgression in humans. *Nat. Rev. Genet.* 16, 359–371.
28. Huerta-Sánchez, E., Jin, X., Asan, Bianba, Z., Peter, B.M., Vinckenbosch, N., Liang, Y., Yi, X., He, M., Somel, M., et al. (2014). Altitude adaptation in Tibetans caused by introgression of Denisovan-like DNA. *Nature* 512, 194–197.
29. Jagoda, E., Lawson, D.J., Wall, J.D., Lambert, D., Muller, C., Westaway, M., Leavesley, M., Capellini, T.D., Mirazón Lahr, M., Gerbault, P., et al. (2017). Disentangling immediate adaptive introgression from selection on standing introgressed variation in humans. *Mol. Biol. Evol.* 35, 623–630.
30. Dannemann, M., and Racimo, F. (2018). Something old, something borrowed: admixture and adaptation in human evolution. *Curr. Opin. Genet. Dev.* 53, 1–8.
31. Kudaravalli, S., Veyrieras, J.B., Stranger, B.E., Dermitzakis, E.T., and Pritchard, J.K. (2009). Gene expression levels are a target of recent natural selection in the human genome. *Mol. Biol. Evol.* 26, 649–658.
32. Villar, D., Berthelot, C., Aldridge, S., Rayner, T.F., Lukk, M., Pignatelli, M., Park, T.J., Deaville, R., Erichsen, J.T., Jasinska, A.J., et al. (2015). Enhancer evolution across 20 mammalian species. *Cell* 160, 554–566.
33. Kundaje, A., Meuleman, W., Ernst, J., Bilienky, M., Yen, A., Heravi-Moussavi, A., Kheradpour, P., Zhang, Z., Wang, J., Ziller, M.J., et al.; Roadmap Epigenomics Consortium (2015). Integrative analysis of 111 reference human epigenomes. *Nature* 518, 317–330.
34. Enright, A.J., John, B., Gaul, U., Tuschl, T., Sander, C., and Marks, D.S. (2003). MicroRNA targets in Drosophila. *Genome Biol.* 5, R1.
35. 1000 Genomes Project Consortium, Auton, A., Brooks, L.D., Durbin, R.M., Garrison, E.P., Kang, H.M., Korbel, J.O., Marchini, J.L., McCarthy, S., McVean, G.A., and Abecasis, G.R. (2015). A global reference for human genetic variation. *Nature* 526, 68–74.
36. McVicker, G., Gordon, D., Davis, C., and Green, P. (2009). Widespread genomic signatures of natural selection in hominid evolution. *PLoS Genet.* 5, e1000471.
37. Javierre, B.M., Burren, O.S., Wilder, S.P., Kreuzhuber, R., Hill, S.M., Sewitz, S., Cairns, J., Wingett, S.W., Várnai, C., Thiecke, M.J., et al.; BLUEPRINT Consortium (2016). Lineage-specific genome architecture links enhancers and non-coding disease variants to target gene promoters. *Cell* 167, 1369–1384.e19.
38. Pan, D.Z., Garske, K.M., Alvarez, M., Bhagat, Y.V., Boocock, J., Nikkola, E., Miao, Z., Raulerson, C.K., Cantor, R.M., Civelek,

- M., et al. (2018). Integration of human adipocyte chromosomal interactions with adipose gene expression prioritizes obesity-related genes from GWAS. *Nat. Commun.* *9*, 1512.
39. Sleiman, P.M., Wang, M.L., Cianferoni, A., Aceves, S., Goncalves, N., Nadeau, K., Bredenoord, A.J., Furuta, G.T., Spergel, J.M., and Hakonarson, H. (2014). GWAS identifies four novel eosinophilic esophagitis loci. *Nat. Commun.* *5*, 5593.
  40. Syring, I., Weiten, R., Müller, T., Schmidt, D., Steiner, S., Kristiansen, G., Müller, S.C., and Ellinger, J. (2018). The knock-down of the Mediator complex subunit MED15 restrains urothelial bladder cancer cells' malignancy. *Oncol. Lett.* *16*, 3013–3021.
  41. Weiten, R., Müller, T., Schmidt, D., Steiner, S., Kristiansen, G., Müller, S.C., Ellinger, J., and Syring, I. (2018). The Mediator complex subunit MED15, a promoter of tumour progression and metastatic spread in renal cell carcinoma. *Cancer Biomark.* *21*, 839–847.
  42. Shaikhbrahim, Z., Offermann, A., Halbach, R., Vogel, W., Braun, M., Kristiansen, G., Bootz, F., Wenzel, J., Mikut, R., Lengerke, C., et al. (2015). Clinical and molecular implications of MED15 in head and neck squamous cell carcinoma. *Am. J. Pathol.* *185*, 1114–1122.
  43. Fan, L., Chen, L., Ni, X., Guo, S., Zhou, Y., Wang, C., Zheng, Y., Shen, F., Kolluri, V.K., Muktiali, M., et al. (2017). Genetic variant of miR-4293 rs12220909 is associated with susceptibility to non-small cell lung cancer in a Chinese Han population. *PLoS ONE* *12*, e0175666.
  44. Zhang, P., Wang, J., Lu, T., Wang, X., Zheng, Y., Guo, S., Yang, Y., Wang, M., Kolluri, V.K., Qiu, L., et al. (2015). miR-449b rs10061133 and miR-4293 rs12220909 polymorphisms are associated with decreased esophageal squamous cell carcinoma in a Chinese population. *Tumour Biol.* *36*, 8789–8795.
  45. Kropp, P.A., and Gannon, M. (2016). Onecut transcription factors in development and disease. *Trends Dev. Biol.* *9*, 43–57.
  46. Lu, T., Wu, B., Yu, Y., Zhu, W., Zhang, S., Zhang, Y., Guo, J., and Deng, N. (2018). Blockade of ONECUT2 expression in ovarian cancer inhibited tumor cell proliferation, migration, invasion and angiogenesis. *Cancer Sci.* *109*, 2221–2234.
  47. Gao, Z., Daquinag, A.C., Su, F., Snyder, B., and Kolonin, M.G. (2018). PDGFR $\alpha$ /PDGFR $\beta$  signaling balance modulates progenitor cell differentiation into white and beige adipocytes. *Development* *145*, dev155861.
  48. Onogi, Y., Wada, T., Kamiya, C., Inata, K., Matsuzawa, T., Inaba, Y., Kimura, K., Inoue, H., Yamamoto, S., Ishii, Y., et al. (2017). PDGFR $\beta$  regulates adipose tissue expansion and glucose metabolism via vascular remodeling in diet-induced obesity. *Diabetes* *66*, 1008–1021.
  49. Kim, Y.J., Hwang, S.J., Bae, Y.C., and Jung, J.S. (2009). MiR-21 regulates adipogenic differentiation through the modulation of TGF-beta signaling in mesenchymal stem cells derived from human adipose tissue. *Stem Cells* *27*, 3093–3102.
  50. Chang, H.R., Kim, H.J., Xu, X., and Ferrante, A.W., Jr. (2016). Macrophage and adipocyte IGF1 maintain adipose tissue homeostasis during metabolic stresses. *Obesity (Silver Spring)* *24*, 172–183.
  51. Yau, S.W., Russo, V.C., Clarke, I.J., Dunshea, F.R., Werther, G.A., and Sabin, M.A. (2015). IGFBP-2 inhibits adipogenesis and lipogenesis in human visceral, but not subcutaneous, adipocytes. *Int. J. Obes.* *39*, 770–781.
  52. Chan, S.S., Schedlich, L.J., Twigg, S.M., and Baxter, R.C. (2009). Inhibition of adipocyte differentiation by insulin-like growth factor-binding protein-3. *Am. J. Physiol. Endocrinol. Metab.* *296*, E654–E663.
  53. Yao, L., Heuser-Baker, J., Herlea-Pana, O., Zhang, N., Szveda, L.I., Griffin, T.M., and Barlic-Dicen, J. (2014). Deficiency in adipocyte chemokine receptor CXCR4 exacerbates obesity and compromises thermoregulatory responses of brown adipose tissue in a mouse model of diet-induced obesity. *FASEB J.* *28*, 4534–4550.
  54. Sue, N., Jack, B.H., Eaton, S.A., Pearson, R.C., Funnell, A.P., Turner, J., Czolij, R., Denyer, G., Bao, S., Molero-Navajas, J.C., et al. (2008). Targeted disruption of the basic Krüppel-like factor gene (Klf3) reveals a role in adipogenesis. *Mol. Cell. Biol.* *28*, 3967–3978.
  55. Du, B., Cawthorn, W.P., Su, A., Doucette, C.R., Yao, Y., Hemati, N., Kampert, S., McCoin, C., Broome, D.T., Rosen, C.J., et al. (2013). The transcription factor paired-related homeobox 1 (Prrx1) inhibits adipogenesis by activating transforming growth factor- $\beta$  (TGF $\beta$ ) signaling. *J. Biol. Chem.* *288*, 3036–3047.
  56. Steegmann, A.T., Jr., Cerny, F.J., and Holliday, T.W. (2002). Neandertal cold adaptation: Physiological and energetic factors. *Am. J. Hum. Biol.* *14*, 566–583.
  57. Sazzini, M., Schiavo, G., De Fanti, S., Martelli, P.L., Casadio, R., and Luiselli, D. (2014). Searching for signatures of cold adaptations in modern and archaic humans: hints from the brown adipose tissue genes. *Heredity (Edinb)* *113*, 259–267.
  58. Chen, L., Ge, B., Casale, F.P., Vasquez, L., Kwan, T., Garrido-Martín, D., Watt, S., Yan, Y., Kundu, K., Ecker, S., et al. (2016). Genetic drivers of epigenetic and transcriptional variation in human immune cells. *Cell* *167*, 1398–1414.e24.
  59. GTEx Consortium (2013). The Genotype-Tissue Expression (GTEx) project. *Nat. Genet.* *45*, 580–585.

**The American Journal of Human Genetics, Volume 104**

**Supplemental Data**

**Impact and Evolutionary Determinants  
of Neanderthal Introgression on Transcriptional  
and Post-Transcriptional Regulation**

**Martin Silvert, Lluís Quintana-Murci, and Maxime Rotival**

# Supplemental Figures

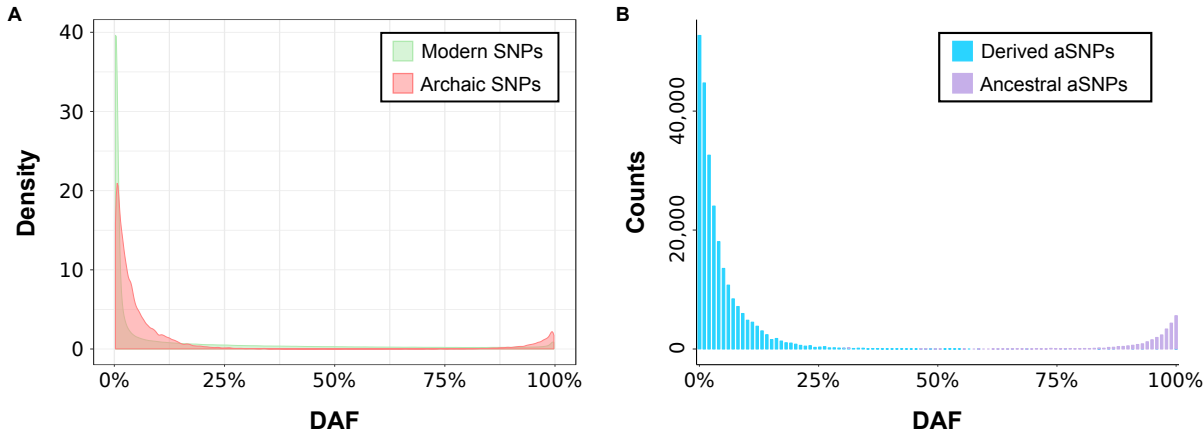

**Figure S1. Allele frequency spectrum of modern and archaic alleles.** (A) Densities of derived allele frequency (DAF) of modern and archaic variants. (B) Number of aSNPs within each bin of DAF, for derived-aSNPs and ancestral-aSNPs separately.

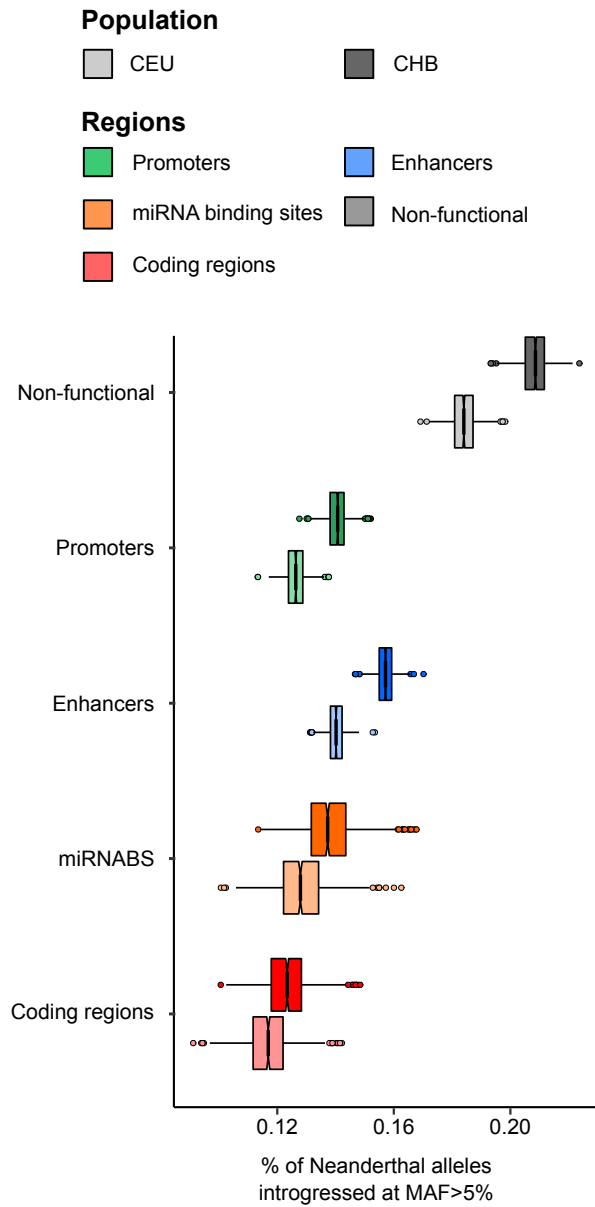

**Figure S2. Percentage of Neanderthal alleles introgressed at a MAF > 5% across different genomic regions, when considering CEU and CHB separately.** For each type of region, boxplots show the variability of the estimates based on 1,000 bootstrap resamples of 100kb genomic windows.



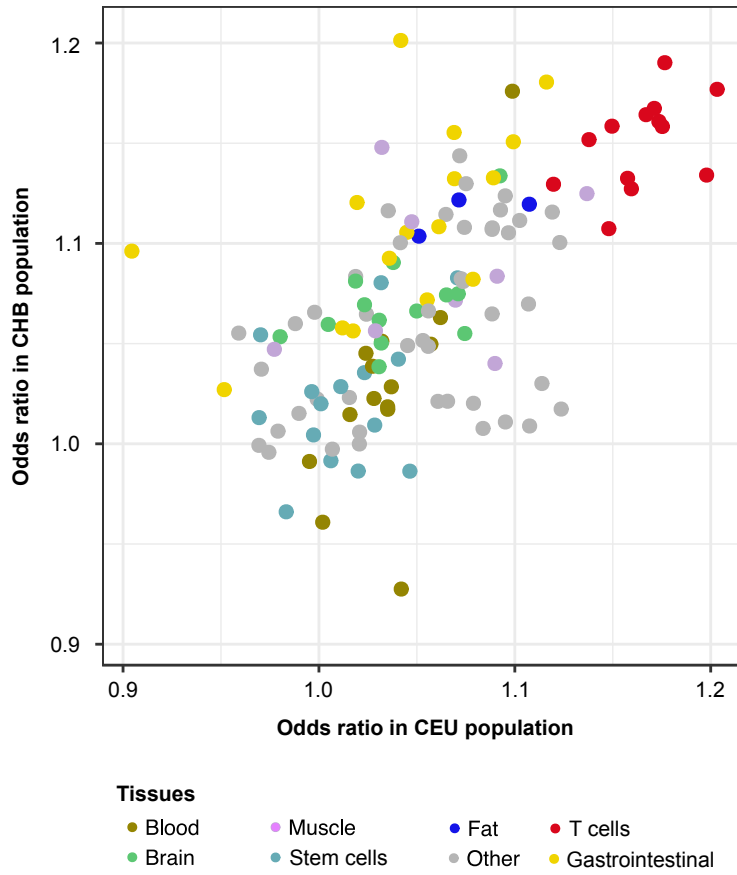

**Figure S3. Comparison of enrichments in common aSNPs at enhancers between European and Asian populations.** For each of the 127 tissues tested, odds ratios are computed in European and Asian samples separately, based on archaic and modern variants that segregate at MAF > 5% in each population.

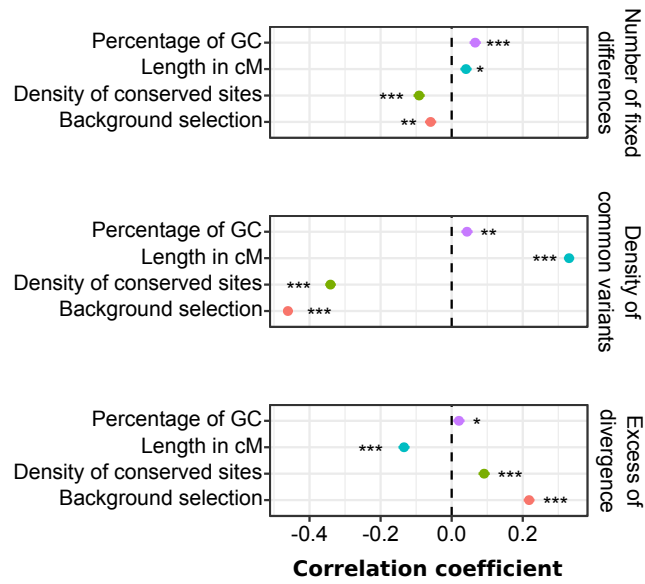

**Figure S4. Effects of neutral and selective factors on the density of common variants and fixed human-Neanderthal differences.** Genome-wide correlations, using 100kb-windows, between the density of fixed human-Neanderthal differences, the density of common variants in Eurasia or the ratio of these metrics (i.e., excess of divergence), and several proxies of neutral and selective factors. \* $p$ -value  $< 10^{-2}$ , \*\* $p$ -value  $< 10^{-10}$ , \*\*\* $p$ -value  $< 10^{-20}$ .

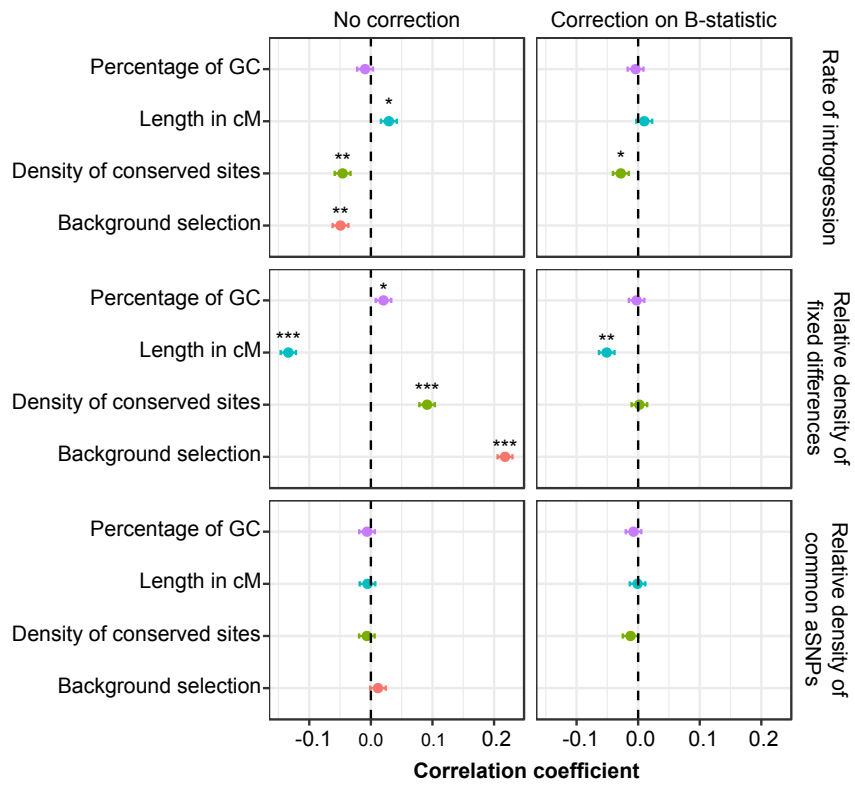

**Figure S5. Effects of neutral and selective factors on rate of introgression and relative density of fixed human-Neanderthal differences, conditional on background selection.** Correlations, computed in 100kb windows along the genome, between the rate of introgression, the relative density of fixed human-Neanderthal differences and common aSNPs, and several proxies of neutral and selective factors. \* $p$ -value  $< 10^{-2}$ , \*\* $p$ -value  $< 10^{-10}$ , \*\*\* $p$ -value  $< 10^{-20}$ . For each correlation, horizontal lines indicate 95% confidence interval.

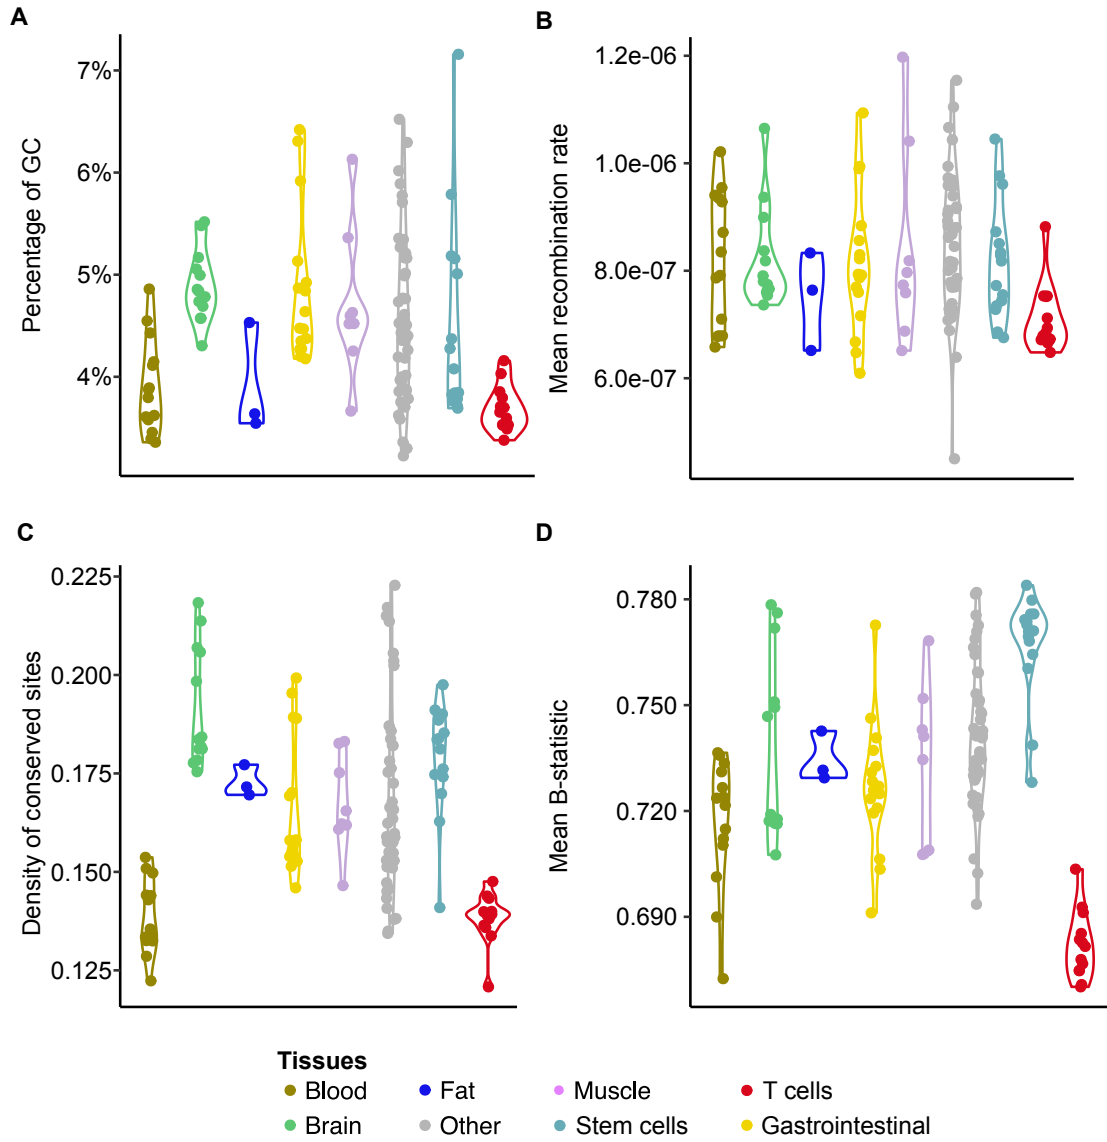

**Figure S6. Intensity of neutral and selective factors at enhancers across tissues.** Values, in the enhancers of the 127 tissues studied, of the percentage of GC, the mean recombination rate, the density of conserved sites (GerpRS > 2), and the mean B-statistic.

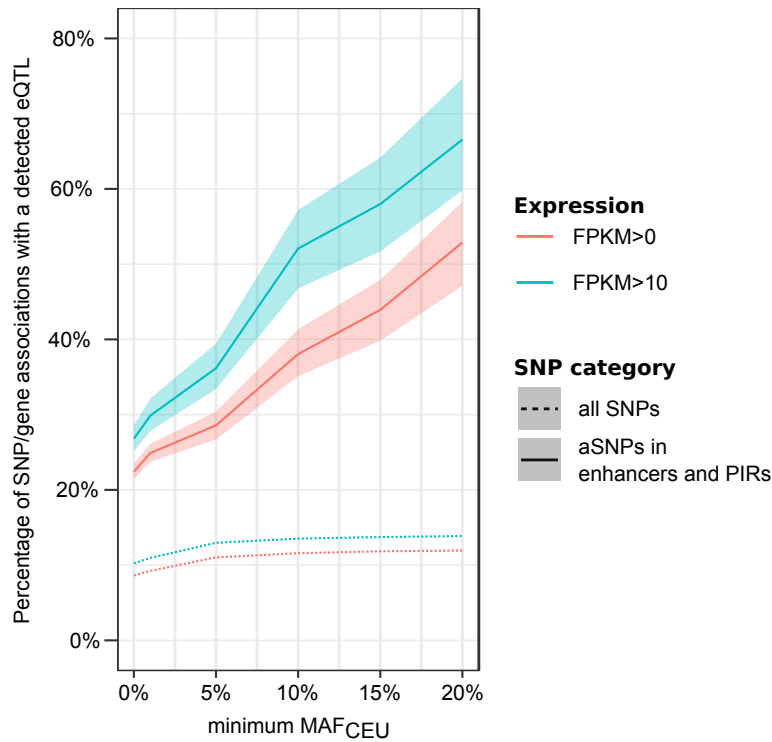

**Figure S7. Effects of enhancer variants on gene expression.** Comparison of the proportion of SNP/gene pairs with an eQTL in the eQTLGen Consortium data,<sup>1</sup> as a function of the frequency of the SNP in the CEU population, and the expression of the gene in whole blood<sup>2</sup> for two classes of SNPs: all SNPs tested in eQTLGen dataset (dotted line), and aSNPs that are in T cell enhancers that interact with the gene promoter (i.e. promoter interacting region – PIR) based on T cell contact maps<sup>3</sup> (plain line). Shaded regions indicate 95% confidence intervals computed by bootstrap.



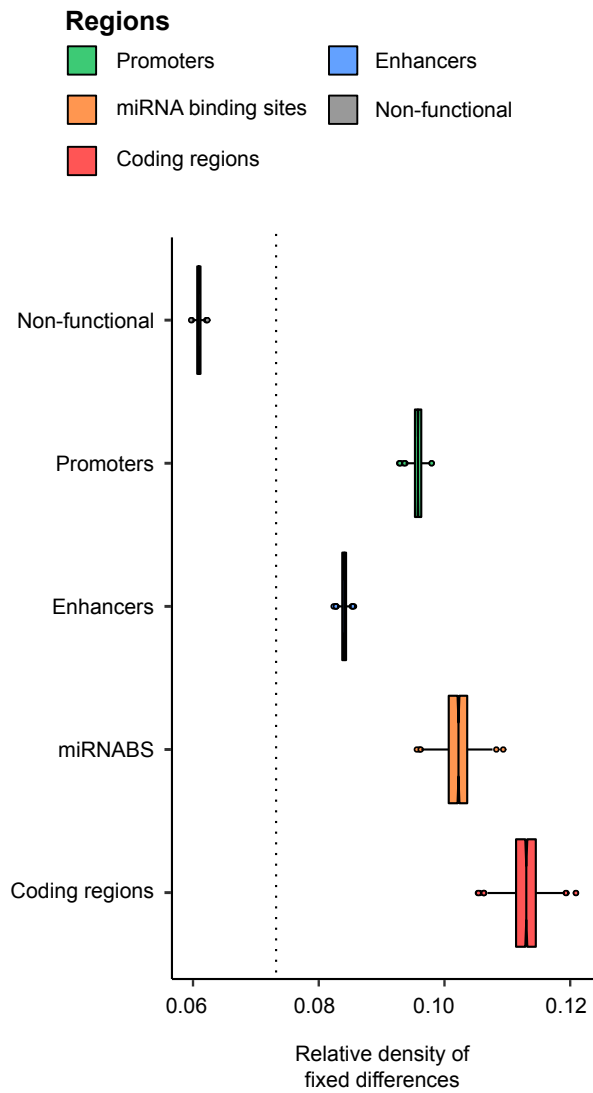

**Figure S8. Relative density of fixed human-Neanderthal differences across genomic regions.** For each type of region, boxplots show the distribution of the estimates of the relative density of fixed human-Neanderthal differences obtained across 1,000 bootstrap resamples of 100kb genomic windows.

## Supplemental Methods

### Definition of archaic SNPs (aSNPs)

We considered all SNPs present in the European (CEU) and Asian (CHB) populations of the 1000 Genomes Consortium phase 3 (ref.<sup>4</sup>). Among them, aSNPs were defined as SNPs that (i) have an allele for which the Neanderthal Altai is homozygous,<sup>5</sup> (ii) are absent from the African Yoruba population, and (iii) are located in a region in which Neanderthal introgression has already been detected in Eurasia (probability of Neanderthal introgression > 0.9) (ref.<sup>6</sup>). To distinguish alleles that originated in the Neanderthal lineage from loci where an ancestral allele was re-introduced by Neanderthal into the modern human lineage, we inferred ancestral/derived states based on the 6EPO ancestor sequence. aSNPs where the Neanderthal allele matches the derived allele were considered as derived-aSNPs, while aSNPs where the Neanderthal allele matches the ancestral state were classified as ancestral-aSNPs. Because variants due to incomplete lineage sorting are more likely to segregate at high frequency, and to minimize false positives among signals of adaptive introgression, we took additional steps to filter out such variants when considering aSNPs at high frequencies (**Figure 5** and **Tables S5** and **S6**). Specifically, we retrieved for each aSNP the set of all aSNPs that are in high linkage disequilibrium ( $r^2 > 0.8$ ) in either CEU or CHB. We then required variants to have at least one linked aSNP at a distance of >10 kb, thus filtering likely cases of incomplete lineage sorting.

### Relative density of aSNPs and enrichments

To measure the impact of Neanderthal introgression on a specific region, or set of regions, we measured the density of Neanderthal variants, as the number of aSNPs in the region, divided by the length (in bp) of the study region. Likewise, the density of non-archaic variants was computed as a measure of the overall diversity of the region. We then measured the excess or depletion of archaic variants in a region by computing the ratios of these densities (i.e. relative density of aSNPs) in the region, which were compared with those of the rest of the genome. In doing so, we obtained an odds ratio that is significantly higher than 1 if the region presents an excess of aSNPs, and significantly lower than 1 if the region is depleted in aSNPs. We also used this statistic considering only aSNPs and SNPs within a given range of frequencies  $f$ , based either on MAF, when considering all aSNPs (MAF<1%, 21% of aSNPs;  $1\% \leq \text{MAF} \leq 5\%$ , 48% of aSNPs; or  $\text{MAF} > 5\%$ , 31% of aSNPs) or DAF, when considering derived and ancestral alleles separately (DAF<1%, 19% of aSNPs;  $1\% \leq \text{DAF} \leq 5\%$ , 44% of aSNPs; or  $5\% < \text{DAF} < 50\%$ , 28% of aSNPs for derived alleles;  $\text{DAF} > 95\%$ , 6% of aSNPs for ancestral alleles).

$$\frac{\#aSNPs_{In\ Region}^f / \#non\ aSNPs_{in\ Region}^f}{\#aSNPs_{Outside\ Region}^f / \#non\ aSNPs_{Oustide\ Region}^f}$$

To compute the significance of the odds ratio, while considering both the haplotype structure of Neanderthal variants and the local structure of the study regions, we divided the genome into windows of 100kb and performed 10,000 bootstrap resamples of these windows, recomputing the odds ratio for each bootstrap sample. We then computed enrichment/depletion  $p$ -values as the percentage of bootstrap resamples where the odds ratio is lower/higher than 1. Bidirectional  $p$ -values were then obtained as  $2 \times \min(p_{\text{enrichment}}, p_{\text{depletion}})$

### Definition of regulatory regions

Human miRNA sequences and their locations were obtained from the miRbase database, version 20 (ref.<sup>7</sup>). We used the miRanda software<sup>8</sup> version 3.3a, to predict miRNA binding sites in the 3'UTR of coding genes, as defined in Ensembl Annotation GRCh37.70. Defaults cutoffs were used. Promoters and enhancers were defined based on chromatin marks in the 127 tissues of the Roadmap Epigenomics Consortium.<sup>9</sup> The calling of promoters and enhancers was performed based on 15-state ChromHMM.<sup>10</sup> We considered the union of the *Active TSS* and *Flanking TSS* as “promoters”, and the union of the *Enh* (enhancers) and *EnhG* (enhancers genic) categories as “enhancers”.

### Characterizing the impact of introgression on regulatory regions

To dissect the relative contribution of Human-Neanderthal divergence, and post-admixture removal of Neanderthal introgressed variants in shaping the current landscape of introgressed regulatory variants, we first searched for fixed differences between the genomes of Neanderthals and modern humans. Namely, we considered as a fixed difference any variant (i) where both Neanderthal Altai<sup>5</sup> and Neanderthal Vindija<sup>11</sup> were homozygous for an allele, (ii) absent in 6EPO ancestor sequence and (iii) absent in the Yoruba population.<sup>4</sup> We then defined the density of fixed differences in a region as the number of fixed differences over the number of sites in that region, where sequence information was available for Altai, Vindija and 6EPO genomes. This density was further divided by the density of common variants in the region to yield a ‘relative density of fixed differences’, which measures the excess of divergence in a study region given its overall diversity. Reciprocally, we considered as the rate of introgression, the percentage of fixed differences

that were introgressed into modern humans and reach a MAF of at least 5%. With these definitions, the product of the rate of introgression and the relative density of fixed differences is equal to the relative density of common aSNPs in the region.

### **Impact of neutral and selective factors on introgression-related metrics**

We investigated the effects of mutation, recombination, and negative selection (directly or indirectly through background selection) on various introgression-related metrics, including the rate of introgression, the relative density of fixed differences, as well as the density of archaic variants segregating in CEU and CHB populations. To do so, we split the human genome into 100kb windows, and focused on sites where sequence information was available for Altai, Vindija and 6EPO genomes, excluding windows where sequence information was available for less than 50% of the window. We then computed, for each window, the percentage of GC or CG dinucleotide in the sequence, the mean recombination rate, the proportion of conserved sites ( $\text{GerpRS} > 2$ ) and the mean B-statistic. For each of these metrics, the Pearson correlations with each introgression-related metric were computed across all windows.

Next, similarly to what we performed genome-wide, we subdivided the genome in 100kb windows and, for each tissue, we computed, at windows containing enhancers, the total enhancer's length and the percentage of GC, mean recombination rate, percentage of conserved sites ( $\text{GerpRS} > 2$ ) and mean B-statistic in the corresponding enhancers. For each tissue, we then assembled enhancers from randomly sampled windows and tissues to create a pseudo-tissue, for which we can compute the relative density of fixed differences, the rate of introgression and relative density of common aSNPs. To ensure that the reconstructed tissues had an enhancer structure that is comparable to the original tissue, each resampled pair (window and tissue) was selected so that the length of their enhancers matched that of the enhancers from the original tissue.

To evaluate the contribution of neutral and selective forces to the relative density of fixed differences and rate of introgression, we performed additional resamples matching enhancers simultaneously for their percentage of GC, mean recombination rate, percentage of conserved sites and mean B-statistic, in addition to their length. For each tested tissue and matching, a total of 1,000 resamplings was performed and a  $p$ -value was computed as the number of resamplings for which the relative density of fixed differences or rate of introgression at enhancers of the tested tissue exceeded that of enhancers in the reconstructed tissue. When resampling, we used the following bins for matching: (i) total enhancer length: 20 bins defined as follows [0-200 bp], [200-400 bp], [400-600 bp], [600-800 bp], [800 bp-1kb], [1-1.5 kb], [1.5-2 kb], [2-3 kb], [3-4 kb], [4-5 kb], [5-7.5 kb], [7.5-10 kb], [10-20 kb], [20-30 kb], [30-40 kb], [40-50 kb], [50-75 kb], [75-100 kb], and [100-200 kb], (ii)

percentage of GC and percentage of sites with GerpRS > 2: 20 uniformly distributed bins of 5% width, (iii) B-statistic: 10 uniform bins of width 0.1, and (iv) mean recombination rate: 10 bins, based on deciles.

### **Identification of enhancer-interacting genes**

To assign genes to the enhancers detected that are active in AdMSC, we used promoter-capture HiC (PC-HiC) data obtained from adipose tissue,<sup>12</sup> and assigned each promoter to a gene when it is located within 100 bp of its TSS. We then selected all interactions with a CHiCAGO score above 5, where the promoter-interacting region overlapped an enhancer in AdMSC, and assigned the corresponding genes as targets of the enhancer. For primary T cells, we used PC-HiC data obtained from Javierre *et al.*<sup>3</sup> We selected interactions with CHiCAGO score above 5 in the total CD8<sup>+</sup> T cells, as promoter interacting regions in this cell type showed the strongest overlap with core T cell enhancers (Jaccard Index = 9.7%).

### **GO Enrichments**

To assess whether specific biological functions had been preferentially affected by archaic introgression at enhancers, we considered both tissues where PC-HiC was available, and assigned each enhancer to a gene based on promoter interactions. As enhancers can control multiple genes (22% of core T Cell enhancers are associated to more than 5 genes, with up to 73 associated genes for the same enhancer), and genes that share a common biological function tend to be found in clusters along the genome, we filtered out enhancers with more than 3 target genes from our enrichment analysis, thus reducing the risk of spurious enrichments due to clusters of co-regulated genes. We then used the GOseq package<sup>13</sup> to search for biological functions overrepresented among genes with aSNPs in their enhancers, using the set of all genes with a SNP in their enhancers as background and adjusting on total enhancer length of each gene.



### **Supplemental Note 1: Effect of aSNPs in enhancers on gene expression**

To assess the impact on gene expression of aSNPs that overlap enhancer regions, we first considered, for each gene, the set of aSNPs that overlap promoter-interacting enhancers in primary T-cells (focusing on core T cell enhancers). We then assessed the frequency at which such aSNPs were associated with changes in gene expression, based on GTEx eQTLs and whole blood eQTLs identified by the eQTLGen consortium.<sup>1,2</sup> We found that while only ~1% of aSNPs that overlap core T cell enhancers regulate their associated gene in GTEx tissues (FDR <5%), this figure reaches 22% when considering eQTLs obtained through meta-analysis of whole blood samples from over 30,000 donors.<sup>1</sup> This suggests that while enhancer-overlapping aSNPs contribute to gene expression variability, large sample sizes are required to assess their true effects. Consistent with this notion, we observed that the proportion of enhancer aSNPs that control the expression of their associated genes increases with median gene expression and allele frequency (**Figure S7**), reaching 67% for genes with FPKM>10 and aSNPs with a MAF >20% in Europe. Our data suggests that while >60% of enhancer-overlapping aSNPs are significantly associated with gene expression variation, many of these associations are usually missed by eQTL studies due to low power or under-representation of individuals of non-European ancestry.

## Supplemental References

1. Vösa, U., Claringbould, A., Westra, H.-J., Bonder, M.J., Deelen, P., Zeng, B., Kirsten, H., Saha, A., Kreuzhuber, R., Kasela, S., et al. (2018). Unraveling the polygenic architecture of complex traits using blood eQTL meta-analysis. *bioRxiv*, doi.org/10.1101/447367
2. GTEx Consortium (2013). The Genotype-Tissue Expression (GTEx) project. *Nat Genet* 45, 580-585.
3. Javierre, B.M., Burren, O.S., Wilder, S.P., Kreuzhuber, R., Hill, S.M., Sewitz, S., Cairns, J., Wingett, S.W., Varnai, C., Thiecke, M.J., et al. (2016). Lineage-Specific Genome Architecture Links Enhancers and Non-coding Disease Variants to Target Gene Promoters. *Cell* 167, 1369-1384.
4. 1000 Genomes Project Consortium, Auton, A., Brooks, L.D., Durbin, R.M., Garrison, E.P., Kang, H.M., Korbel, J.O., Marchini, J.L., McCarthy, S., McVean, G.A., et al. (2015). A global reference for human genetic variation. *Nature* 526, 68-74.
5. Prufer, K., Racimo, F., Patterson, N., Jay, F., Sankararaman, S., Sawyer, S., Heinze, A., Renaud, G., Sudmant, P.H., de Filippo, C., et al. (2014). The complete genome sequence of a Neanderthal from the Altai Mountains. *Nature* 505, 43-49.
6. Sankararaman, S., Mallick, S., Dannemann, M., Prufer, K., Kelso, J., Paabo, S., Patterson, N., and Reich, D. (2014). The genomic landscape of Neanderthal ancestry in present-day humans. *Nature* 507, 354-357.
7. Chou, C.H., Shrestha, S., Yang, C.D., Chang, N.W., Lin, Y.L., Liao, K.W., Huang, W.C., Sun, T.H., Tu, S.J., Lee, W.H., et al. (2018). miRTarBase update 2018: a resource for experimentally validated microRNA-target interactions. *Nucleic Acids Res* 46, D296-D302.
8. Enright, A.J., John, B., Gaul, U., Tuschl, T., Sander, C., and Marks, D.S. (2003). MicroRNA targets in *Drosophila*. *Genome Biol* 5, R1.
9. Roadmap Epigenomics Consortium, Kundaje, A., Meuleman, W., Ernst, J., Bilenky, M., Yen, A., Heravi-Moussavi, A., Kheradpour, P., Zhang, Z., Wang, J., et al. (2015). Integrative analysis of 111 reference human epigenomes. *Nature* 518, 317-330.
10. Ernst, J., and Kellis, M. (2017). Chromatin-state discovery and genome annotation with ChromHMM. *Nat Protoc* 12, 2478-2492.
11. Prufer, K., de Filippo, C., Grote, S., Mafessoni, F., Korlevic, P., Hajdinjak, M., Vernot, B., Skov, L., Hsieh, P., Peyregne, S., et al. (2017). A high-coverage Neandertal genome from Vindija Cave in Croatia. *Science* 358, 655-658.
12. Pan, D.Z., Garske, K.M., Alvarez, M., Bhagat, Y.V., Boocock, J., Nikkola, E., Miao, Z., Raulerson, C.K., Cantor, R.M., Civelek, M., et al. (2018). Integration of human adipocyte chromosomal interactions with adipose gene expression prioritizes obesity-related genes from GWAS. *Nat Commun* 9, 1512.
13. Young, M.D., Wakefield, M.J., Smyth, G.K., and Oshlack, A. (2010). Gene ontology analysis for RNA-seq: accounting for selection bias. *Genome Biol* 11, R14.
